# Supplementary material
Source: PubMed Central journal article supplement (PMC9346938)
Supplement: mmc1.pdf [file mmc1.pdf]

**Supplementary 1. Information on epidemiology of COVID-19 in Countries, Regions and sites involved in the study.**

| Plant locations | Epidemiology of COVID-19 |                   |                  |          |                   |                  |                       |                       |                     |
|-----------------|--------------------------|-------------------|------------------|----------|-------------------|------------------|-----------------------|-----------------------|---------------------|
|                 | Country                  |                   |                  | Region   |                   |                  | Site                  |                       |                     |
|                 | N° cases                 | Population number | Rate per 100.000 | N° cases | Population number | Rate per 100.000 | N° of confirmed cases | N° of suspected cases | Total N° of workers |
| US              | 1.720.000                | 328.200.000       | 524              | 26.049   | 4.468.000         | 583              | 1                     | 29                    | 149                 |
| Colombia        | 367.453                  | 49.650.000        | 740              | 25.196   | 4.476.000         | 563              | 3                     | 1                     | 102                 |
| Chile           | 71.230                   | 18.730.000        | 380              | 20.479   | 7.037.000         | 291              | 0                     | 5                     | 250                 |
| Mexico          | 211.827                  | 126.200.000       | 168              | 36.560   | 8.855.000         | 413              | 1                     | 100                   | 500                 |
| Germany         | 55.547                   | 83.020.000        | 67               | 13.316   | 17.930.000        | 74               | 0                     | 6                     | 250                 |
| France          | 228.265                  | 66.990.000        | 341              | 10.009   | 5.555.000         | 180              | 0                     | 2                     | 260                 |
| Spain           | 317.060                  | 46.940.000        | 675              | 42.931   | 7.566.000         | 567              | 4                     | 21                    | 418                 |
| New Zealand     | 246                      | 4.886.000         | 5                | 246      | 4.886.000         | 5                | 0                     | 0                     | 33                  |
| Total           | 2.971.628                | 724.616.000       | 410              | 174.786  | 60.773.000        | 288              | 9                     | 164                   | 1962                |

**Supplementary 2. Lockdown measures in the site country during the study period.**

|                                      | <b>US</b> | <b>Colombia</b> | <b>Chile</b> | <b>Mexico</b> | <b>Germany</b> | <b>France</b> | <b>Spain</b> | <b>New Zealand</b> |
|--------------------------------------|-----------|-----------------|--------------|---------------|----------------|---------------|--------------|--------------------|
| <b>School closure</b>                | Partially | Yes             | Yes          | Yes           | No             | No            | Partially    | No                 |
| <b>Not essential shops closed</b>    | No        | Yes             | Partially    | Partially     | Partially      | No            | Partially    | No                 |
| <b>Mass gatherings events banned</b> | Partially | Yes             | Yes          | Yes           | Yes            | Yes           | Yes          | No                 |
| <b>National movement banned</b>      | Partially | Yes             | Partially    | Partially     | Partially      | Partially     | Yes          | No                 |
| <b>Local movement banned</b>         | No        | Yes             | Partially    | Partially     | Partially      | No            | Partially    | No                 |
| <b>Mandatory use of mask</b>         | Yes       | Yes             | Yes          | Partially     | Yes            | Partially*    | Yes          | No                 |

\*Mask mandatory at work and in shop

Supplementary 3. Figure 1. Complete sample boxplot with the distribution of scores for each test dimension.

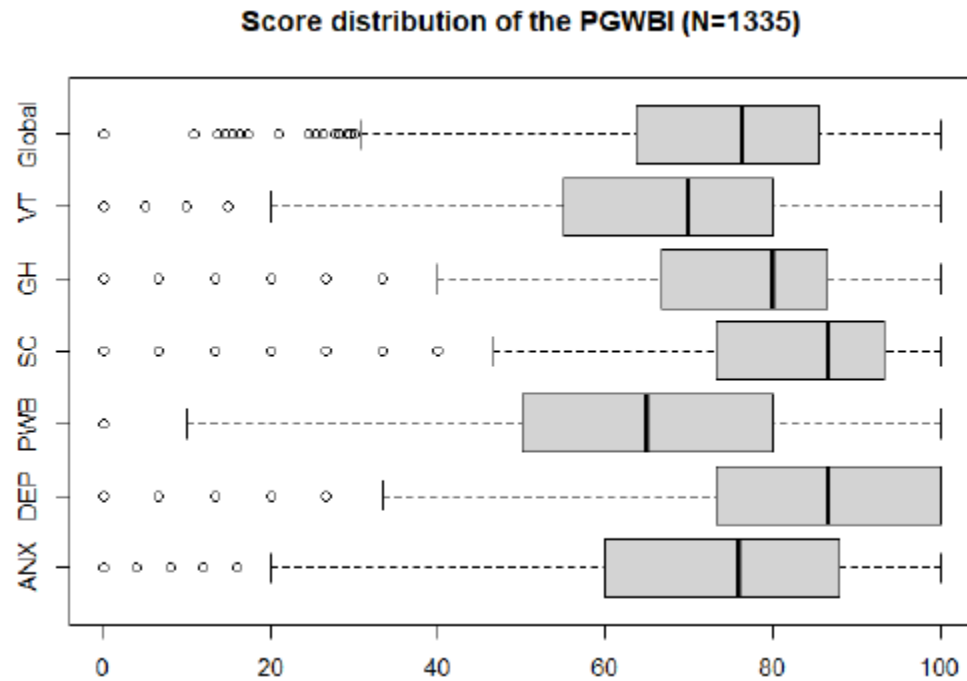

ANX, anxiety; DEP, depression; GH, general health; PoWB, positive well-being; PWB, psychological well-being; PGWBI, psychological global well-being SC, self-control; VT, vitality.

#### Supplementary 4. Pair-wise analysis

| Variable | Group 1    | Group 2  | p-value | Significance | Method         |
|----------|------------|----------|---------|--------------|----------------|
| ANX      | New Zeland | Colombia | 0,000   | ***          | Mann-Whitney U |
| ANX      | New Zeland | Mexico   | 0,000   | ****         | Mann-Whitney U |
| ANX      | New Zeland | Germany  | 0,790   | ns           | Mann-Whitney U |
| ANX      | New Zeland | France   | 0,801   | ns           | Mann-Whitney U |
| ANX      | New Zeland | US       | 0,500   | ns           | Mann-Whitney U |
| ANX      | New Zeland | Chile    | 0,292   | ns           | Mann-Whitney U |
| ANX      | New Zeland | Spain    | 0,091   | ns           | Mann-Whitney U |
| ANX      | Colombia   | Mexico   | 0,384   | ns           | Mann-Whitney U |
| ANX      | Colombia   | Germany  | 0,000   | ****         | Mann-Whitney U |
| ANX      | Colombia   | France   | 0,000   | ****         | Mann-Whitney U |
| ANX      | Colombia   | US       | 0,000   | ****         | Mann-Whitney U |
| ANX      | Colombia   | Chile    | 0,000   | ****         | Mann-Whitney U |
| ANX      | Colombia   | Spain    | 0,001   | ***          | Mann-Whitney U |
| ANX      | Mexico     | Germany  | 0,000   | ****         | Mann-Whitney U |
| ANX      | Mexico     | France   | 0,000   | ****         | Mann-Whitney U |
| ANX      | Mexico     | US       | 0,000   | ****         | Mann-Whitney U |
| ANX      | Mexico     | Chile    | 0,000   | ****         | Mann-Whitney U |
| ANX      | Mexico     | Spain    | 0,000   | ****         | Mann-Whitney U |
| ANX      | Germany    | France   | 0,392   | ns           | Mann-Whitney U |
| ANX      | Germany    | US       | 0,565   | ns           | Mann-Whitney U |
| ANX      | Germany    | Chile    | 0,018   | *            | Mann-Whitney U |
| ANX      | Germany    | Spain    | 0,000   | ***          | Mann-Whitney U |
| ANX      | France     | US       | 0,275   | ns           | Mann-Whitney U |
| ANX      | France     | Chile    | 0,173   | ns           | Mann-Whitney U |
| ANX      | France     | Spain    | 0,017   | *            | Mann-Whitney U |
| ANX      | US         | Chile    | 0,014   | *            | Mann-Whitney U |
| ANX      | US         | Spain    | 0,001   | ***          | Mann-Whitney U |
| ANX      | Chile      | Spain    | 0,179   | ns           | Mann-Whitney U |
| DEP      | New Zeland | Colombia | 0,000   | ****         | Mann-Whitney U |

|      |            |          |       |      |                |
|------|------------|----------|-------|------|----------------|
| DEP  | New Zeland | Mexico   | 0,000 | **** | Mann-Whitney U |
| DEP  | New Zeland | Germany  | 0,316 | ns   | Mann-Whitney U |
| DEP  | New Zeland | France   | 0,109 | ns   | Mann-Whitney U |
| DEP  | New Zeland | US       | 0,035 | *    | Mann-Whitney U |
| DEP  | New Zeland | Chile    | 0,005 | **   | Mann-Whitney U |
| DEP  | New Zeland | Spain    | 0,000 | ***  | Mann-Whitney U |
| DEP  | Colombia   | Mexico   | 0,261 | ns   | Mann-Whitney U |
| DEP  | Colombia   | Germany  | 0,000 | **** | Mann-Whitney U |
| DEP  | Colombia   | France   | 0,001 | ***  | Mann-Whitney U |
| DEP  | Colombia   | US       | 0,028 | *    | Mann-Whitney U |
| DEP  | Colombia   | Chile    | 0,008 | **   | Mann-Whitney U |
| DEP  | Colombia   | Spain    | 0,072 | ns   | Mann-Whitney U |
| DEP  | Mexico     | Germany  | 0,000 | **** | Mann-Whitney U |
| DEP  | Mexico     | France   | 0,000 | **** | Mann-Whitney U |
| DEP  | Mexico     | US       | 0,000 | ***  | Mann-Whitney U |
| DEP  | Mexico     | Chile    | 0,000 | **** | Mann-Whitney U |
| DEP  | Mexico     | Spain    | 0,000 | **** | Mann-Whitney U |
| DEP  | Germany    | France   | 0,214 | ns   | Mann-Whitney U |
| DEP  | Germany    | US       | 0,049 | *    | Mann-Whitney U |
| DEP  | Germany    | Chile    | 0,002 | **   | Mann-Whitney U |
| DEP  | Germany    | Spain    | 0,000 | **** | Mann-Whitney U |
| DEP  | France     | US       | 0,371 | ns   | Mann-Whitney U |
| DEP  | France     | Chile    | 0,126 | ns   | Mann-Whitney U |
| DEP  | France     | Spain    | 0,007 | **   | Mann-Whitney U |
| DEP  | US         | Chile    | 0,795 | ns   | Mann-Whitney U |
| DEP  | US         | Spain    | 0,269 | ns   | Mann-Whitney U |
| DEP  | Chile      | Spain    | 0,182 | ns   | Mann-Whitney U |
| PoWB | New Zeland | Colombia | 0,000 | **** | Mann-Whitney U |
| PoWB | New Zeland | Mexico   | 0,000 | **** | Mann-Whitney U |
| PoWB | New Zeland | Germany  | 0,826 | ns   | Mann-Whitney U |
| PoWB | New Zeland | France   | 0,219 | ns   | Mann-Whitney U |
| PoWB | New Zeland | US       | 0,464 | ns   | Mann-Whitney U |

|      |            |          |       |      |                |
|------|------------|----------|-------|------|----------------|
| PoWB | New Zeland | Chile    | 0,010 | *    | Mann-Whitney U |
| PoWB | New Zeland | Spain    | 0,150 | ns   | Mann-Whitney U |
| PoWB | Colombia   | Mexico   | 0,113 | ns   | Mann-Whitney U |
| PoWB | Colombia   | Germany  | 0,000 | **** | Mann-Whitney U |
| PoWB | Colombia   | France   | 0,000 | ***  | Mann-Whitney U |
| PoWB | Colombia   | US       | 0,001 | ***  | Mann-Whitney U |
| PoWB | Colombia   | Chile    | 0,006 | **   | Mann-Whitney U |
| PoWB | Colombia   | Spain    | 0,000 | **** | Mann-Whitney U |
| PoWB | Mexico     | Germany  | 0,000 | **** | Mann-Whitney U |
| PoWB | Mexico     | France   | 0,000 | **** | Mann-Whitney U |
| PoWB | Mexico     | US       | 0,000 | **** | Mann-Whitney U |
| PoWB | Mexico     | Chile    | 0,000 | **** | Mann-Whitney U |
| PoWB | Mexico     | Spain    | 0,000 | **** | Mann-Whitney U |
| PoWB | Germany    | France   | 0,049 | *    | Mann-Whitney U |
| PoWB | Germany    | US       | 0,222 | ns   | Mann-Whitney U |
| PoWB | Germany    | Chile    | 0,000 | **** | Mann-Whitney U |
| PoWB | Germany    | Spain    | 0,011 | *    | Mann-Whitney U |
| PoWB | France     | US       | 0,779 | ns   | Mann-Whitney U |
| PoWB | France     | Chile    | 0,061 | ns   | Mann-Whitney U |
| PoWB | France     | Spain    | 0,960 | ns   | Mann-Whitney U |
| PoWB | US         | Chile    | 0,070 | ns   | Mann-Whitney U |
| PoWB | US         | Spain    | 0,676 | ns   | Mann-Whitney U |
| PoWB | Chile      | Spain    | 0,021 | *    | Mann-Whitney U |
| SC   | New Zeland | Colombia | 0,000 | **** | Mann-Whitney U |
| SC   | New Zeland | Mexico   | 0,000 | **** | Mann-Whitney U |
| SC   | New Zeland | Germany  | 0,174 | ns   | Mann-Whitney U |
| SC   | New Zeland | France   | 0,240 | ns   | Mann-Whitney U |
| SC   | New Zeland | US       | 0,013 | *    | Mann-Whitney U |
| SC   | New Zeland | Chile    | 0,001 | **   | Mann-Whitney U |
| SC   | New Zeland | Spain    | 0,000 | ***  | Mann-Whitney U |
| SC   | Colombia   | Mexico   | 0,404 | ns   | Mann-Whitney U |
| SC   | Colombia   | Germany  | 0,000 | **** | Mann-Whitney U |

|    |            |          |       |      |                |
|----|------------|----------|-------|------|----------------|
| SC | Colombia   | France   | 0,000 | **** | Mann-Whitney U |
| SC | Colombia   | US       | 0,001 | ***  | Mann-Whitney U |
| SC | Colombia   | Chile    | 0,000 | ***  | Mann-Whitney U |
| SC | Colombia   | Spain    | 0,000 | ***  | Mann-Whitney U |
| SC | Mexico     | Germany  | 0,000 | **** | Mann-Whitney U |
| SC | Mexico     | France   | 0,000 | **** | Mann-Whitney U |
| SC | Mexico     | US       | 0,001 | ***  | Mann-Whitney U |
| SC | Mexico     | Chile    | 0,000 | **** | Mann-Whitney U |
| SC | Mexico     | Spain    | 0,000 | **** | Mann-Whitney U |
| SC | Germany    | France   | 0,846 | ns   | Mann-Whitney U |
| SC | Germany    | US       | 0,048 | *    | Mann-Whitney U |
| SC | Germany    | Chile    | 0,001 | ***  | Mann-Whitney U |
| SC | Germany    | Spain    | 0,000 | **** | Mann-Whitney U |
| SC | France     | US       | 0,037 | *    | Mann-Whitney U |
| SC | France     | Chile    | 0,000 | ***  | Mann-Whitney U |
| SC | France     | Spain    | 0,000 | **** | Mann-Whitney U |
| SC | US         | Chile    | 0,532 | ns   | Mann-Whitney U |
| SC | US         | Spain    | 0,330 | ns   | Mann-Whitney U |
| SC | Chile      | Spain    | 0,605 | ns   | Mann-Whitney U |
| GH | New Zeland | Colombia | 0,092 | ns   | Mann-Whitney U |
| GH | New Zeland | Mexico   | 0,000 | **** | Mann-Whitney U |
| GH | New Zeland | Germany  | 0,704 | ns   | Mann-Whitney U |
| GH | New Zeland | France   | 0,632 | ns   | Mann-Whitney U |
| GH | New Zeland | US       | 0,860 | ns   | Mann-Whitney U |
| GH | New Zeland | Chile    | 0,934 | ns   | Mann-Whitney U |
| GH | New Zeland | Spain    | 0,023 | *    | Mann-Whitney U |
| GH | Colombia   | Mexico   | 0,000 | ***  | Mann-Whitney U |
| GH | Colombia   | Germany  | 0,003 | **   | Mann-Whitney U |
| GH | Colombia   | France   | 0,119 | ns   | Mann-Whitney U |
| GH | Colombia   | US       | 0,055 | ns   | Mann-Whitney U |
| GH | Colombia   | Chile    | 0,012 | *    | Mann-Whitney U |
| GH | Colombia   | Spain    | 0,687 | ns   | Mann-Whitney U |

|    |            |          |       |      |                |
|----|------------|----------|-------|------|----------------|
| GH | Mexico     | Germany  | 0,000 | **** | Mann-Whitney U |
| GH | Mexico     | France   | 0,000 | **** | Mann-Whitney U |
| GH | Mexico     | US       | 0,000 | **** | Mann-Whitney U |
| GH | Mexico     | Chile    | 0,000 | **** | Mann-Whitney U |
| GH | Mexico     | Spain    | 0,000 | **** | Mann-Whitney U |
| GH | Germany    | France   | 0,176 | ns   | Mann-Whitney U |
| GH | Germany    | US       | 0,442 | ns   | Mann-Whitney U |
| GH | Germany    | Chile    | 0,406 | ns   | Mann-Whitney U |
| GH | Germany    | Spain    | 0,000 | **** | Mann-Whitney U |
| GH | France     | US       | 0,668 | ns   | Mann-Whitney U |
| GH | France     | Chile    | 0,445 | ns   | Mann-Whitney U |
| GH | France     | Spain    | 0,017 | *    | Mann-Whitney U |
| GH | US         | Chile    | 0,893 | ns   | Mann-Whitney U |
| GH | US         | Spain    | 0,004 | **   | Mann-Whitney U |
| GH | Chile      | Spain    | 0,000 | **** | Mann-Whitney U |
| VT | New Zeland | Colombia | 0,000 | **** | Mann-Whitney U |
| VT | New Zeland | Mexico   | 0,000 | **** | Mann-Whitney U |
| VT | New Zeland | Germany  | 0,017 | *    | Mann-Whitney U |
| VT | New Zeland | France   | 0,754 | ns   | Mann-Whitney U |
| VT | New Zeland | US       | 0,285 | ns   | Mann-Whitney U |
| VT | New Zeland | Chile    | 0,596 | ns   | Mann-Whitney U |
| VT | New Zeland | Spain    | 0,205 | ns   | Mann-Whitney U |
| VT | Colombia   | Mexico   | 0,778 | ns   | Mann-Whitney U |
| VT | Colombia   | Germany  | 0,000 | **** | Mann-Whitney U |
| VT | Colombia   | France   | 0,000 | **** | Mann-Whitney U |
| VT | Colombia   | US       | 0,000 | **** | Mann-Whitney U |
| VT | Colombia   | Chile    | 0,000 | **** | Mann-Whitney U |
| VT | Colombia   | Spain    | 0,000 | **** | Mann-Whitney U |
| VT | Mexico     | Germany  | 0,000 | **** | Mann-Whitney U |
| VT | Mexico     | France   | 0,000 | **** | Mann-Whitney U |
| VT | Mexico     | US       | 0,000 | **** | Mann-Whitney U |
| VT | Mexico     | Chile    | 0,000 | **** | Mann-Whitney U |



|        |            |          |       |      |                |
|--------|------------|----------|-------|------|----------------|
| VT     | Mexico     | Spain    | 0,000 | **** | Mann-Whitney U |
| VT     | Germany    | France   | 0,003 | **   | Mann-Whitney U |
| VT     | Germany    | US       | 0,138 | ns   | Mann-Whitney U |
| VT     | Germany    | Chile    | 0,000 | **** | Mann-Whitney U |
| VT     | Germany    | Spain    | 0,000 | **** | Mann-Whitney U |
| VT     | France     | US       | 0,294 | ns   | Mann-Whitney U |
| VT     | France     | Chile    | 0,131 | ns   | Mann-Whitney U |
| VT     | France     | Spain    | 0,005 | **   | Mann-Whitney U |
| VT     | US         | Chile    | 0,016 | *    | Mann-Whitney U |
| VT     | US         | Spain    | 0,001 | ***  | Mann-Whitney U |
| VT     | Chile      | Spain    | 0,141 | ns   | Mann-Whitney U |
| Global | New Zeland | Colombia | 0,000 | **** | Mann-Whitney U |
| Global | New Zeland | Mexico   | 0,000 | **** | Mann-Whitney U |
| Global | New Zeland | Germany  | 0,642 | ns   | Mann-Whitney U |
| Global | New Zeland | France   | 0,407 | ns   | Mann-Whitney U |
| Global | New Zeland | US       | 0,574 | ns   | Mann-Whitney U |
| Global | New Zeland | Chile    | 0,064 | ns   | Mann-Whitney U |
| Global | New Zeland | Spain    | 0,011 | *    | Mann-Whitney U |
| Global | Colombia   | Mexico   | 0,205 | ns   | Mann-Whitney U |
| Global | Colombia   | Germany  | 0,000 | **** | Mann-Whitney U |
| Global | Colombia   | France   | 0,000 | **** | Mann-Whitney U |
| Global | Colombia   | US       | 0,000 | **** | Mann-Whitney U |
| Global | Colombia   | Chile    | 0,000 | **** | Mann-Whitney U |
| Global | Colombia   | Spain    | 0,000 | **** | Mann-Whitney U |
| Global | Mexico     | Germany  | 0,000 | **** | Mann-Whitney U |
| Global | Mexico     | France   | 0,000 | **** | Mann-Whitney U |
| Global | Mexico     | US       | 0,000 | **** | Mann-Whitney U |
| Global | Mexico     | Chile    | 0,000 | **** | Mann-Whitney U |
| Global | Mexico     | Spain    | 0,000 | **** | Mann-Whitney U |
| Global | Germany    | France   | 0,090 | ns   | Mann-Whitney U |
| Global | Germany    | US       | 0,209 | ns   | Mann-Whitney U |
| Global | Germany    | Chile    | 0,000 | ***  | Mann-Whitney U |

|        |         |       |            |                |
|--------|---------|-------|------------|----------------|
| Global | Germany | Spain | 0,000 **** | Mann-Whitney U |
| Global | France  | US    | 0,846 ns   | Mann-Whitney U |
| Global | France  | Chile | 0,123 ns   | Mann-Whitney U |
| Global | France  | Spain | 0,012 *    | Mann-Whitney U |
| Global | US      | Chile | 0,102 ns   | Mann-Whitney U |
| Global | US      | Spain | 0,014 *    | Mann-Whitney U |
| Global | Chile   | Spain | 0,228 ns   | Mann-Whitney U |

ANX, anxiety; DEP, depression; GH, general health; ns, not significant; PoWB, positive well-being; SC, self-control; VT, vitality.
